# Supplementary material for: Structural basis for the activation of the lipid scramblase TMEM16F
Source: PubMed Central journal article supplement (PMC9637102; doi:10.1038/s41467-022-34497-x), 2022-11-05
Supplement: 41467_2022_34497_MOESM3_ESM.pdf [file 41467_2022_34497_MOESM3_ESM.pdf]

**File name: Supplementary Movie 1**

**Description:** Morph between known TMEM16F structures defining a pathway towards activation. The video shows a single subunit in two different orientations. The protein is displayed as ribbon, with selected  $\alpha$ -helices shown in unique colors ( $\alpha$ 3 red,  $\alpha$ 4 green,  $\alpha$ 6 blue). C $\alpha$  positions of F518, W619 and Q623, which interact in the active conformation, are shown as red spheres. Membrane boundaries are indicated.
